# Supplementary material for: Reactivity triggered by an organic microcrystal interface: a case study involving an environmentally benign, aromatic boric acid reaction
Source: Royal Society of Chemistry journal article supplement (doi:10.1039/d0cc04805d), 2020-01-01
Supplement: d0cc04805d3.pdf [file d0cc04805d3.pdf]

# Supporting Information

## Organic microcrystal interface triggered reactivity: A case study of environmentally benign aromatic boric acid reaction

Xiaonan Ji,<sup>†‡</sup> Wei Xu,<sup>\*†</sup> Huarui Zhao, <sup>†</sup> Fen Mei,<sup>†‡</sup> YanYan Fu<sup>†</sup>, Qingguo He,<sup>\*†‡</sup> Huimin Cao, <sup>†</sup> Jiangong Cheng<sup>\*†‡</sup>

<sup>†</sup> State Key Lab of Transducer Technology, Shanghai Institute of Microsystem and Information Technology, Chinese Academy of Sciences, Changning Road 865, Shanghai 200050, China.

<sup>‡</sup> Center of Materials Science and Optoelectronics Engineering, University of the Chinese Academy of Sciences, Yuquan Road 19, Beijing, 100039, China

E-mail: [windxu@mail.sim.ac.cn](mailto:windxu@mail.sim.ac.cn); [hqg@mail.sim.ac.cn](mailto:hqg@mail.sim.ac.cn); [jgcheng@mail.sim.ac.cn](mailto:jgcheng@mail.sim.ac.cn);

Fax: +86-21-62511070-8934; Tel: +86-21-62511070-8967.

## contents

|                                                                              |    |
|------------------------------------------------------------------------------|----|
| Preparation methods .....                                                    | 2  |
| Fluorescence photos of 9-ANB isotope labelling experiment .....              | 2  |
| Simulation configurations .....                                              | 4  |
| Forcite Dynamics .....                                                       | 4  |
| Reaction data of aromatic boric acids with triethylamine addition (μL) ..... | 11 |
| 2-NAB .....                                                                  | 12 |
| 9-ANB .....                                                                  | 14 |
| 9-PHB .....                                                                  | 15 |
| 1-PYB .....                                                                  | 16 |
| Additional time related reaction monitoring data .....                       | 18 |
| SEM photos of the micro-nano system. ....                                    | 21 |

## Preparation methods

### 9-ANB microcrystal:

Based on the strategy rooted from the traditional solution phase recrystallization process, we used liquid–liquid interface precipitation method to gain 9-ANB microcrystal. 9-ANB was first dissolved in pure THF solvent to gain 1 mg/mL 9-ANB THF solution. Then distilled water was slowly added into the THF solution dropwise. The solution gradually became cloudy with blue fluorescence emission, together with the formation of microcrystals which can be observed by eyes. The optimum ratio of tetrahydrofuran to water for microcrystal formation was 1:3. In this condition, the microcrystal of 9-ANB can react with weak bases in highest rate. After a series of experiments, we found that only THF/H<sub>2</sub>O mixed solvent could result in the microcrystal of 9-ANB with high reactivity while other organic solvents like ethanol, DMF and DMSO, showed no such effect, the morphology of amorphous 9-ANB film was shown in Figure S29.

### 9-ANB microcrystal SEM samples:

To show the main crystal plane exposed in the system, we directly collect the floating micro-nano crystals on the SiO<sub>2</sub> substrate, so that the measured XRD signals are relevant to the crystal faces in the reaction system. First, we dropped a droplet of 9-ANB micronano-crystal system onto the SiO<sub>2</sub> substrate and immediately remove it in less than 1 second, then all liquid phase could be removed due to the hydrophobic surface, and the situ micro-nano structure can be directly observed by SEM.

### 9,10-anthraquinone:

22.2 mg (0.1 mmol) 9-ANB was added in 100 mL tetrahydrofuran, then 300 mL distilled water was added. Then 4.8 mg (0.12 mmol) NaOH was added in the solvent. Here NaOH can be replaced by other strong or weak bases, such as *n*-propylamine, diethylamine, or triethylamine, etc. The color of the solvent changes from colorless to yellow immediately, and the fluorescent color changed from blue to yellow. After stirred at room temperature for about 1 hour, the solution turned to be transparent and the fluorescence disappeared. Most of the product 9,10-anthraquinone was gained by filtration as pure precipitation from the solvent. After evaporation and extraction purification steps, 20.6 mg (yield, 99.03%) 9,10-anthraquinone was gained as light-yellow powder with no fluorescence.

All solvents and reagents were purchased from commercial sources and used as received. NMR spectra were measured with Bruker DRX500 instrument, using tetramethylsilane (TMS) as the internal standard substance. Crystal structure was measured with Bruker APEX-II CCD diffractometer. UV–Vis absorption spectra were measured with Jasco V-670 spectrophotometer, while phosphorescence and fluorescence spectra were measured with HORIBA Fluoro-Max 4 spectrometer. Scanning Electron Microscope (SEM) images were taken with JEOL 7800F. The isotope-labeling reactants of <sup>18</sup>O<sub>2</sub> (97% atom% <sup>18</sup>O) was purchased from Shanghai Research Institute of Chemistry Industry Co, Ltd. The isotope-labeling concentration of products was established by isotopic mass spectrometry from Shanghai Research Institute of Chemistry Industry Co, Ltd.

### Fluorescence photos of 9-ANB isotope labelling experiment

We added isotopic experiments with <sup>18</sup>O<sub>2</sub> in the reaction system. Here we used <sup>18</sup>O<sub>2</sub> instead of the suggested oxygen-17 enriched water. The oxygen resource and isotopic measurement are both from Shanghai Research Institute of Chemistry Industry Co, Ltd.

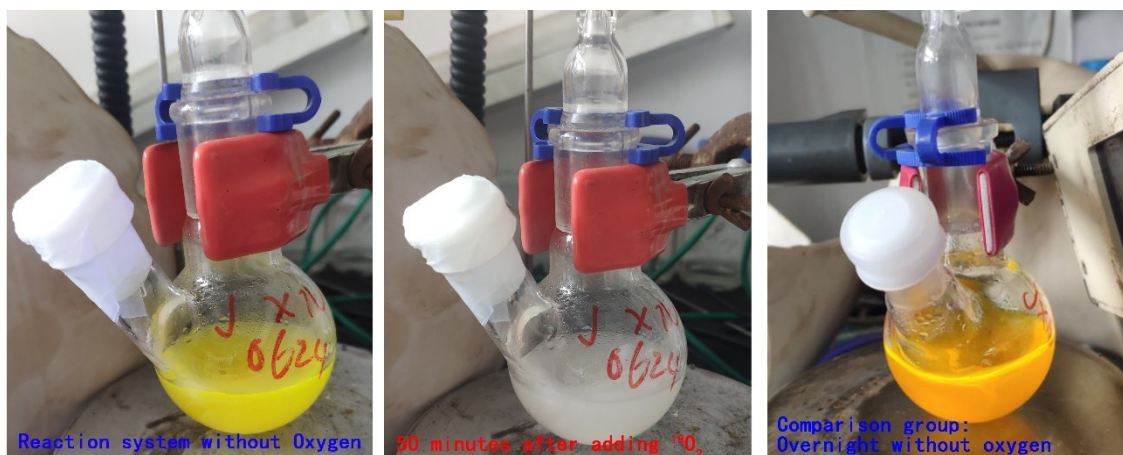

Figure S1. Fluorescent photos of the 9-ANB crystal system after base addition: (a) reaction system without adding oxygen; (b) 50 minutes after adding oxygen ( $^{18}\text{O}_2$ ) (c) comparison group without adding oxygen overnight.

After careful anoxic treatment, the reaction system was prepared in a Double buccal bottle under the protection of Argon. After addition of amine, the microcrystal system rapidly changed into yellow solution with bright yellow fluorescence. Such fluorescent intermediate state remained stable overnight without the existence of oxygen. Therefore, oxygen was a necessary reactant for the second step reaction.

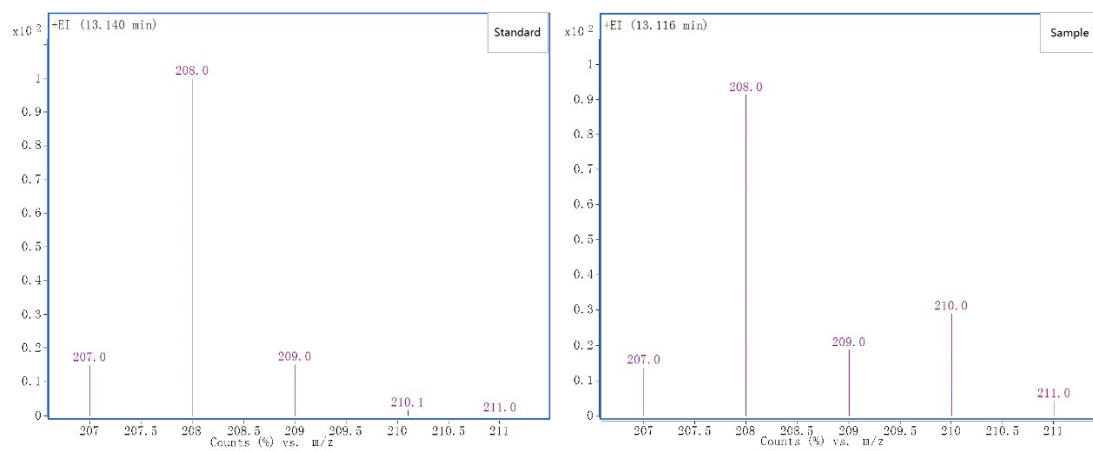

Figure S2. The EI mass spectra of the standard anthraquinone and the isotope labelled sample.

Compared with the natural oxygen, the  $^{18}\text{O}$  atom% was increased from 0.11% to 24.14%. Hence the  $^{16}\text{OH}^-$  ion in solution may probably act an important role in the rearrangement and departure reaction process. In the rearrangement and departure process, the  $^{18}\text{O}$  and  $^{16}\text{O}$  have equal possibility to keep attaching with the carbon atom, leading to nearly 25% atom percent of  $^{18}\text{O}$ . The probable reaction process between active intermediate and dissolved oxygen in solution is as followed in Figure S3.

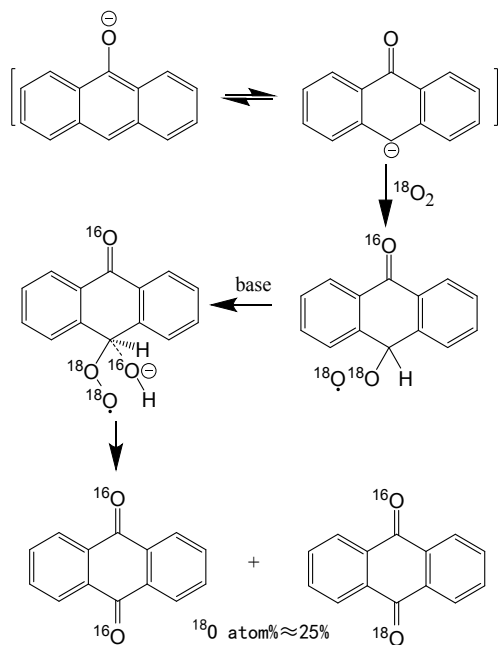

Figure S3. The probable reaction process between active intermediate and dissolved oxygen in solution.

## Simulation configurations

### Forcite Dynamics

Table S1 Forcite Dynamics parameters

|                             |               |
|-----------------------------|---------------|
| Ensemble                    | : NVE         |
| Temperature                 | : 298.00 K    |
| Timestep                    | : 1.00 fs     |
| Number of steps             | : 50000       |
| Duration                    | : 50 ps       |
| Initial velocities          | : Random      |
| Random number seed          | : 1576485843  |
| ---- Energy parameters ---- |               |
| Forcefield                  | : Dreiding    |
| Charges                     | : Use current |
| Electrostatic terms:        |               |
| Summation method            | : Atom based  |

Truncation method : Cubic spline  
 Cutoff distance : 18.5 Å  
 Spline width : 1 Å  
 Buffer width : 0.5 Å

van der Waals terms:

Summation method : Atom based  
 Truncation method : Cubic spline  
 Cutoff distance : 18.5 Å  
 Spline width : 1 Å  
 Buffer width : 0.5 Å

Hydrogen bond terms:

Summation method : Atom based  
 Truncation method : Cubic spline  
 Cutoff distance : 4.5 Å  
 Spline width : 0.5 Å  
 Buffer width : 0.5 Å

---- Constraints ----

Position constraints : 224

---- Dynamics summary ----

|                                       | Initial | Final   | Average | Std. Dev. |
|---------------------------------------|---------|---------|---------|-----------|
| Tot. energy (kcal/mol)                | 38.319  | 38.774  | 38.628  | 0.083     |
| Pot. energy (kcal/mol)                | 18.776  | 23.390  | 24.199  | 2.346     |
| Kin. energy (kcal/mol)                | 19.542  | 15.384  | 14.429  | 2.299     |
| Tot. enthalpy (kcal/mol)              | 38.319  | 38.774  | 38.628  | 0.083     |
| Temperature (K)                       | 298.000 | 234.594 | 220.023 | 35.050    |
| Area (Å <sup>2</sup> )                | 165.473 | 165.473 | 165.473 | 0.000     |
| Surface density (amu/Å <sup>2</sup> ) | 11.347  | 11.347  | 11.347  | 0.000     |

Task terminated : Mon Dec 16 16:44:15 2019

Total CPU time used by Forcite: 12 seconds (12.37s)

Termination status : Normal

Job Name : 3D\_Atomic

Task : Property

Basis : dnp

Atom\_Rcut : 4.100 Angstrom

Functional : blyp

Harris : off

Integration Grid : fine

Occupation : fermi

Pseudopotential : none

Property : Optics (TDDFT)

Iteration : 14

Convergence : 0.0000083 Ha

| hkl      | Multiplicity | dhkl        | Surface area | Surface                                                                                           | Eatt(Total)  | Eatt(vdW)    | Eatt(Electrostatic) | Eatt(H-bond) | Distance    | Total facet area | % Total facet area |
|----------|--------------|-------------|--------------|---------------------------------------------------------------------------------------------------|--------------|--------------|---------------------|--------------|-------------|------------------|--------------------|
| { 0 0 2} | 2            | 16.11965000 | 82.73662884  | 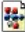 Surface (0 0 2) | -30.36607478 | 0.33501339   | 0.00000000          | -30.70108817 | 30.36607478 | 7.793394e+004    | 52.86636184        |
| { 0 1 1} | 4            | 14.74991589 | 180.83974293 | 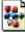 Surface (0 1 1) | -54.70650911 | -47.03123707 | 0.00000000          | -7.67527204  | 54.70650911 | 5.598774e+004    | 37.97919657        |

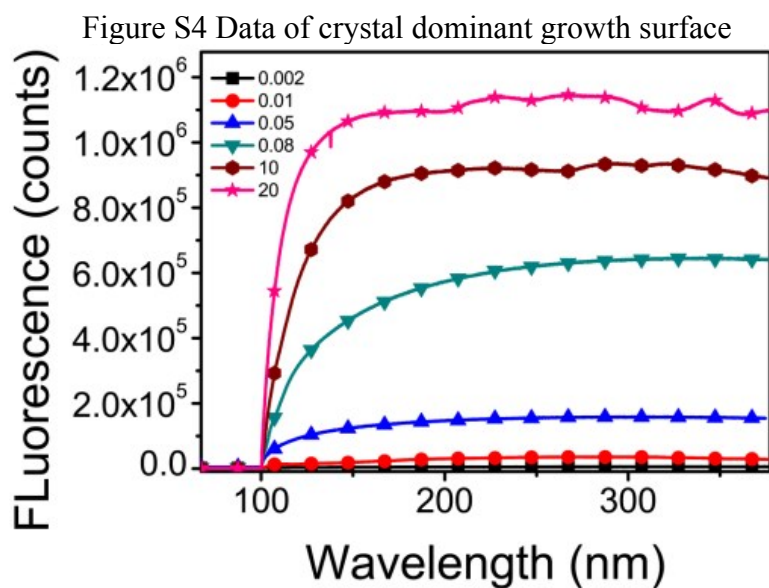

Figure S5. The fluorescence enhancement curves of 9-ANB microcrystal system with different amine addition amount

The Single-crystal data of 9-ANB and 9,10-anthraquinone

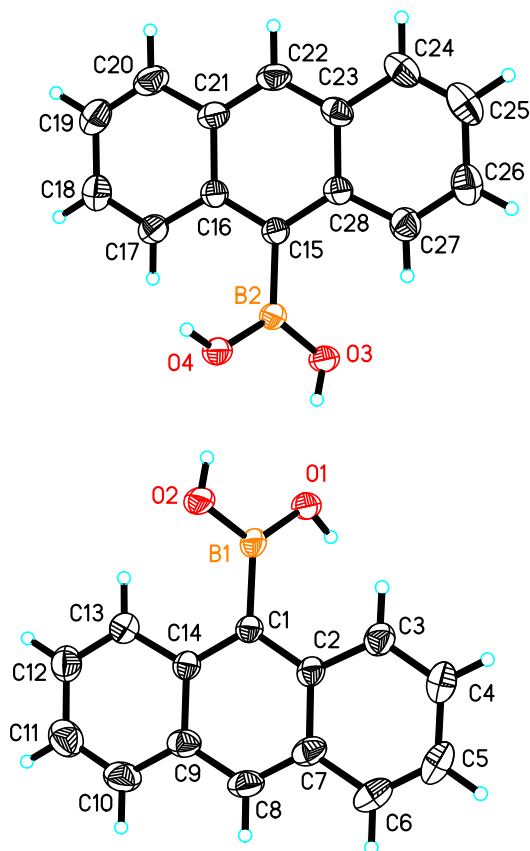

Figure S6 The Single-crystal data of 9-ANB

Table S2. Crystal data and structure refinement for 9-ANB.

|                      |                               |                     |
|----------------------|-------------------------------|---------------------|
| Identification code  | mo_d8v19766_0m                |                     |
| Empirical formula    | $C_{28}H_{22}B_2O_4$          |                     |
| Formula weight       | 444.07                        |                     |
| Temperature          | 293(2) K                      |                     |
| Crystal system       | Orthorhombic                  |                     |
| Space group          | $P2_12_12_1$                  |                     |
| Unit cell dimensions | $a = 4.9878(3) \text{ \AA}$   | $\alpha = 90^\circ$ |
|                      | $b = 16.5878(10) \text{ \AA}$ | $\beta = 90^\circ$  |
|                      | $c = 32.2393(18) \text{ \AA}$ | $\gamma = 90^\circ$ |

|                                   |                                                 |
|-----------------------------------|-------------------------------------------------|
| Volume                            | 2667.4(3) Å <sup>3</sup>                        |
| Z                                 | 4                                               |
| Density (calculated)              | 1.106 mg/m <sup>3</sup>                         |
| Absorption coefficient            | 0.072 mm <sup>-1</sup>                          |
| F(000)                            | 928                                             |
| Crystal size                      | 0.170 * 0.140 * 0.100 mm <sup>3</sup>           |
| Theta range for data collection   | 2.258° to 25.494°                               |
| Index ranges                      | -5<=h<=6, -20<=k<=15, -39<=l<=38                |
| Reflections collected             | 12556                                           |
| Independent reflections           | 4885 [R(int) = 0.0416]                          |
| Completeness to theta = 25.242°   | 99.1 %                                          |
| Absorption correction             | Semi-empirical from equivalents                 |
| Max. and min. transmission        | 0.7456 and 0.5952                               |
| Refinement method                 | Full-matrix least-squares on F <sup>2</sup>     |
| Data / restraints / parameters    | 4885 / 4 / 324                                  |
| Goodness-of-fit on F <sup>2</sup> | 1.047                                           |
| Final R indices [I>2sigma(I)]     | R <sub>1</sub> =0.0678, wR <sub>2</sub> =0.1818 |
| R indices (all data)              | R <sub>1</sub> =0.0917, wR <sub>2</sub> =0.1971 |
| Absolute structure parameter      | 0.1(10)                                         |
| Extinction coefficient            | 0.025(5)                                        |

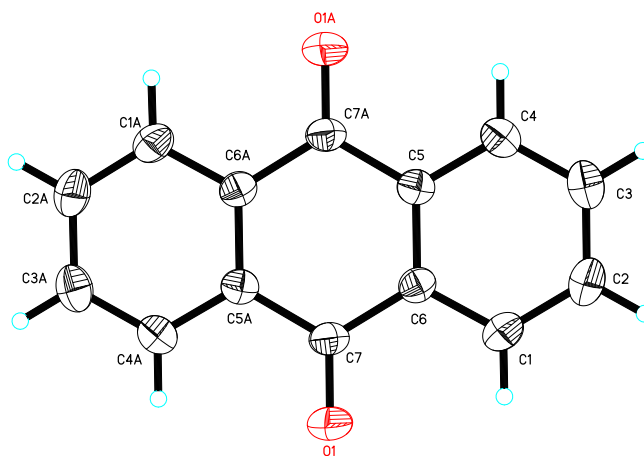

Figure S7 The Single-crystal data of 9,10-anthraquinone

Table S3. Crystal data and structure refinement for 9,10-anthraquinone.

|                                 |                                                |                            |
|---------------------------------|------------------------------------------------|----------------------------|
| Identification code             | mo_d8v19420_0m                                 |                            |
| Empirical formula               | $\text{C}_{14}\text{H}_8\text{O}_2$            |                            |
| Formula weight                  | 208.20                                         |                            |
| Temperature                     | 293(2) K                                       |                            |
| Crystal system                  | Monoclinic                                     |                            |
| Space group                     | $P2_1/C$                                       |                            |
| Unit cell dimensions            | $a = 7.8678(3) \text{ \AA}$                    | $\alpha = 90^\circ$        |
|                                 | $b = 3.9743(2) \text{ \AA}$                    | $\beta = 102.666(2)^\circ$ |
|                                 | $c = 15.8041(6) \text{ \AA}$                   | $\gamma = 90^\circ$        |
| Volume                          | $482.15(4) \text{ \AA}^3$                      |                            |
| Z                               | 2                                              |                            |
| Density (calculated)            | $1.434 \text{ mg/m}^3$                         |                            |
| Absorption coefficient          | $0.096 \text{ mm}^{-1}$                        |                            |
| F(000)                          | 216                                            |                            |
| Crystal size                    | $0.200 \times 0.120 \times 0.080 \text{ mm}^3$ |                            |
| Theta range for data collection | $4.137^\circ$ to $25.997^\circ$                |                            |

|                                   |                                                   |
|-----------------------------------|---------------------------------------------------|
| Index ranges                      | -9<=h<=9, -4<=k<=4, -19<=l<=17                    |
| Reflections collected             | 4365                                              |
| Independent reflections           | 929 [R(int) = 0.0382]                             |
| Completeness to theta = 25.242°   | 98.3 %                                            |
| Absorption correction             | Semi-empirical from equivalents                   |
| Max. and min. transmission        | 0.7456 and 0.6413                                 |
| Refinement method                 | Full-matrix least-squares on F <sup>2</sup>       |
| Data / restraints / parameters    | 929 / 0 / 74                                      |
| Goodness-of-fit on F <sup>2</sup> | 1.060                                             |
| Final R indices [I>2sigma(I)]     | R <sub>1</sub> = 0.0388, wR <sub>2</sub> = 0.1059 |
| R indices (all data)              | R <sub>1</sub> = 0.0472, wR <sub>2</sub> = 0.1142 |

## Reaction data of aromatic boric acids with triethylamine addition ( $\mu\text{L}$ )

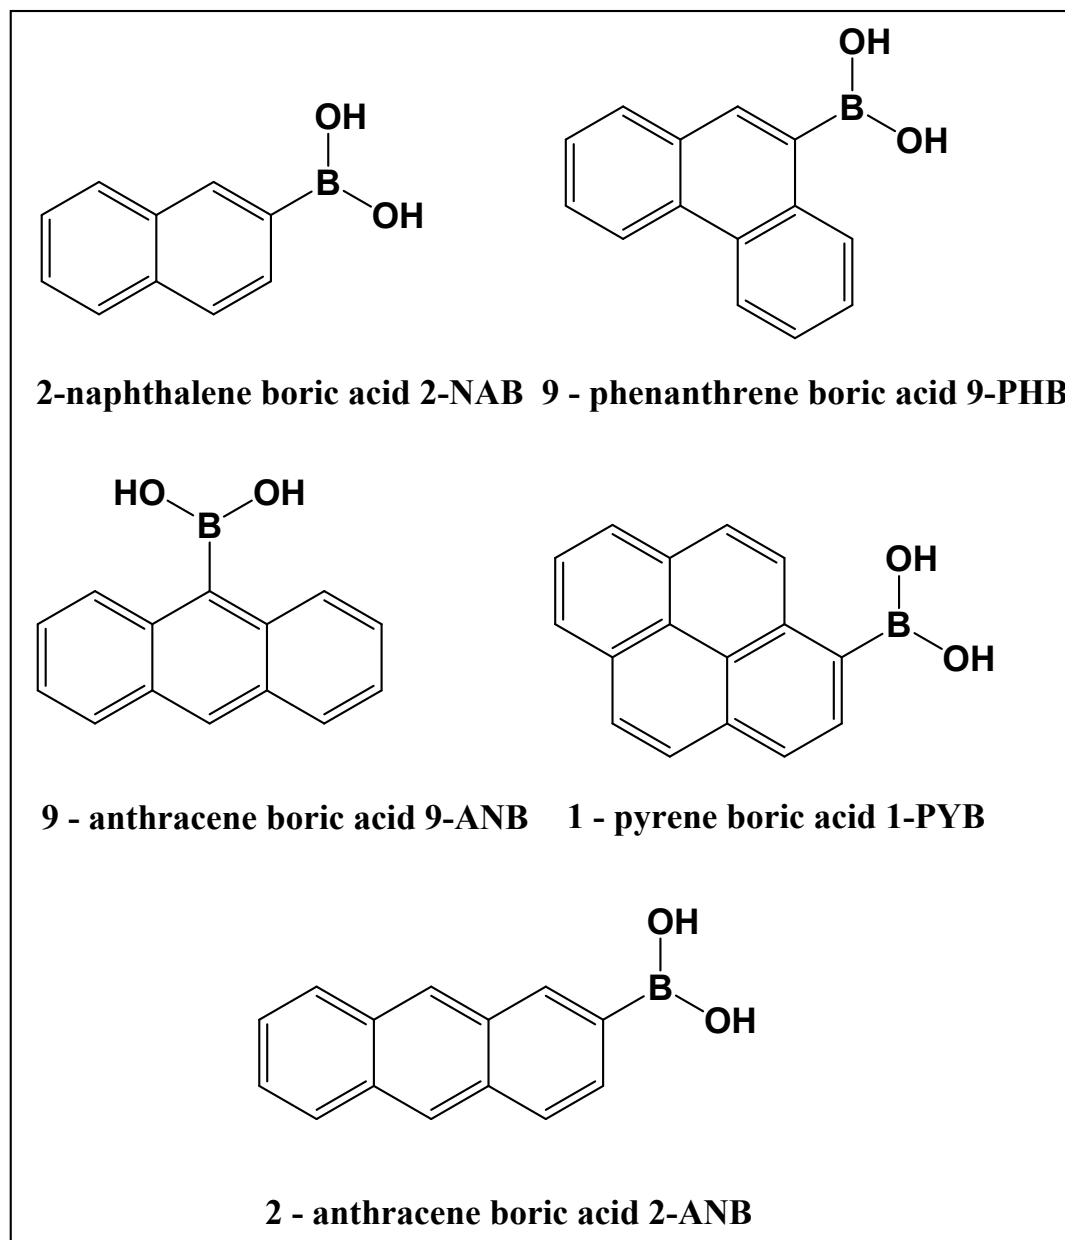

Figure S8 Molecule structures of aromatic boric acids

Molecule structures of 2-naphthalene boric acid (2-NAB) , 9 - anthracene boric acid (9-ANB) , 9 – phenanthrene boric acid (9-PHB) and 1 - pyrene boric acid (1-PYB) are shown in Figure S8.

## 2-NAB

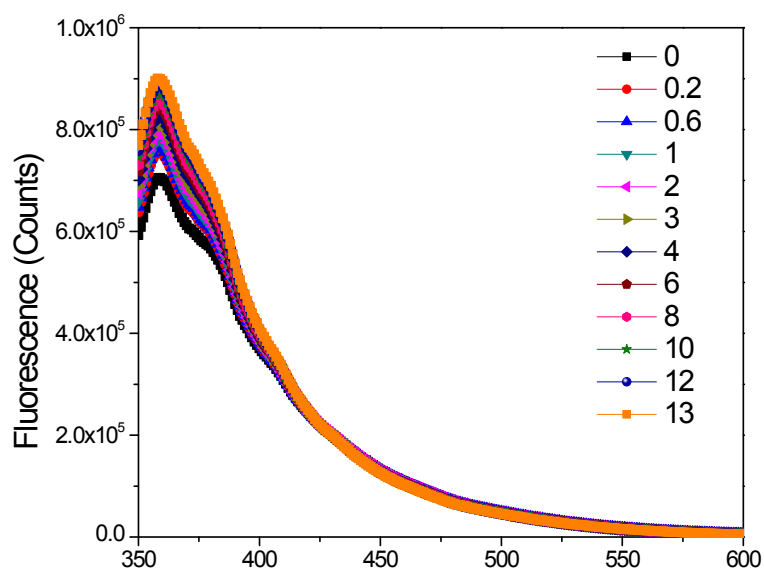

Figure S9 Fluorescence spectra of 1 mg/mL **2-NAB** THF solution, THF/H<sub>2</sub>O (1:0, v/v).

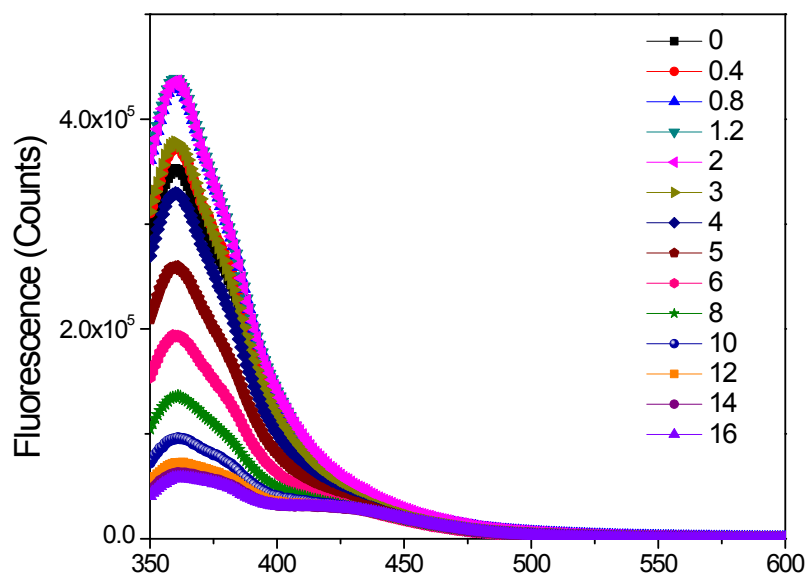

Figure S10 Fluorescence spectra of **2-NAB** in 1 mg/mL THF/H<sub>2</sub>O (1:1, v/v) mixture.

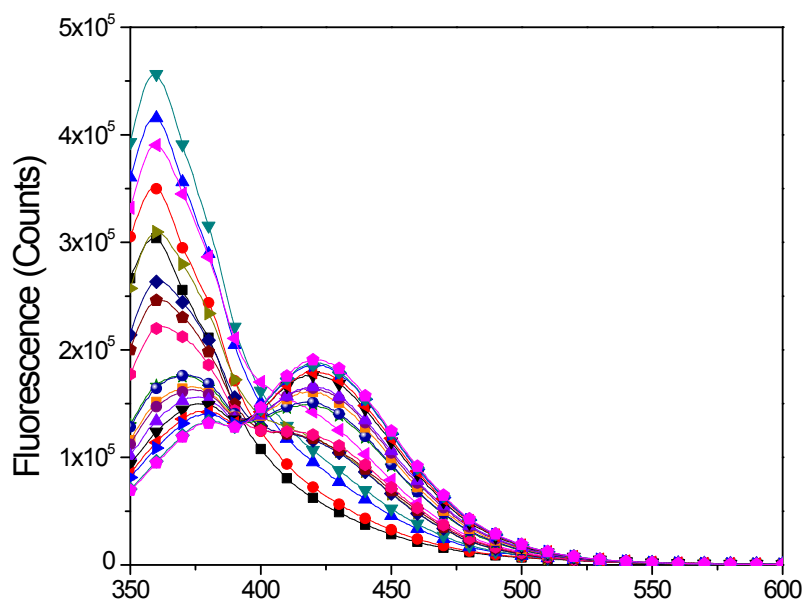

Figure S11 Fluorescence spectra of **2-NAB** in 1 mg/mL THF/H<sub>2</sub>O (1:2, v/v) mixture.

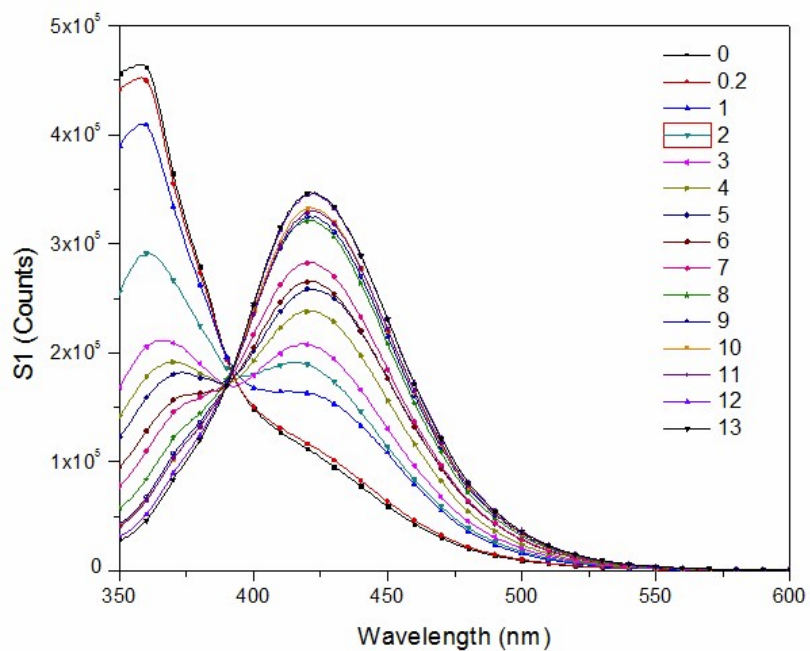

Figure S12 Fluorescence spectra of **2-NAB** in 1 mg/mL THF/H<sub>2</sub>O (1:3, v/v) mixture.

## 9-ANB

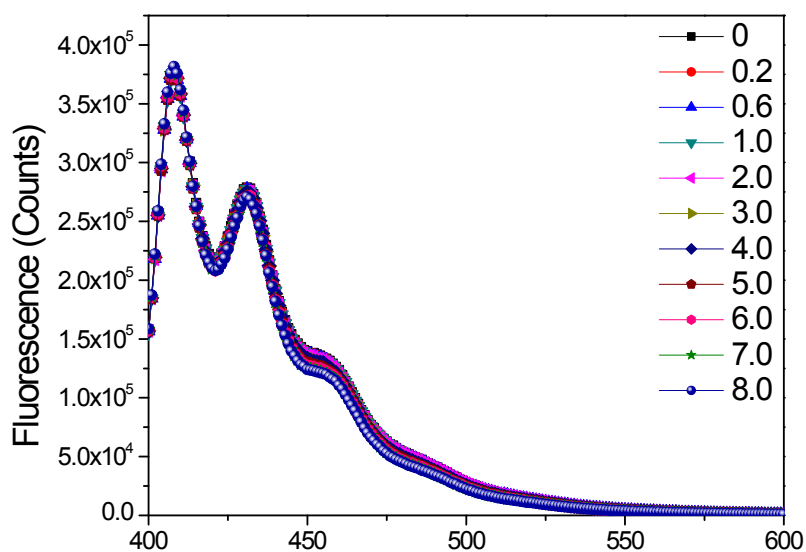

Figure S13 Fluorescence spectra of 1 mg/mL 9-ANB THF solution, THF/H<sub>2</sub>O (1:0, v/v).

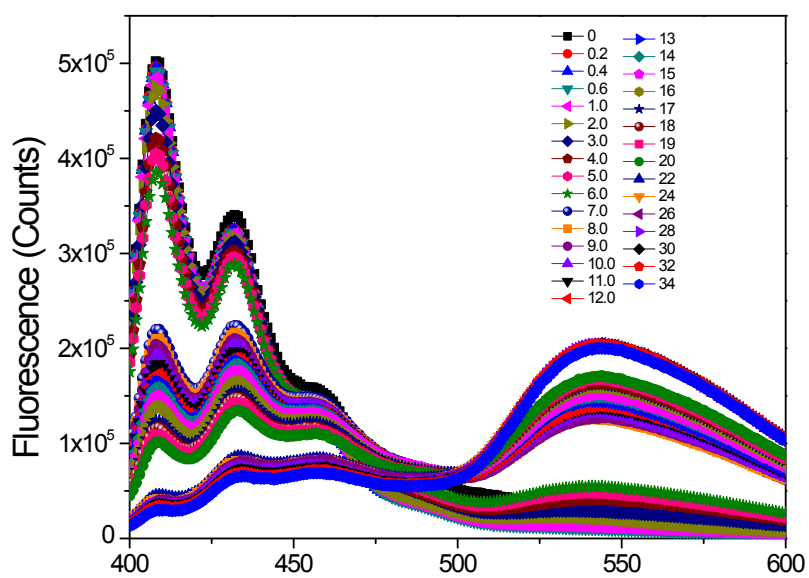

Figure S14 Fluorescence spectra of 9-ANB in 1 mg/mL THF/H<sub>2</sub>O (1:1, v/v) mixture.

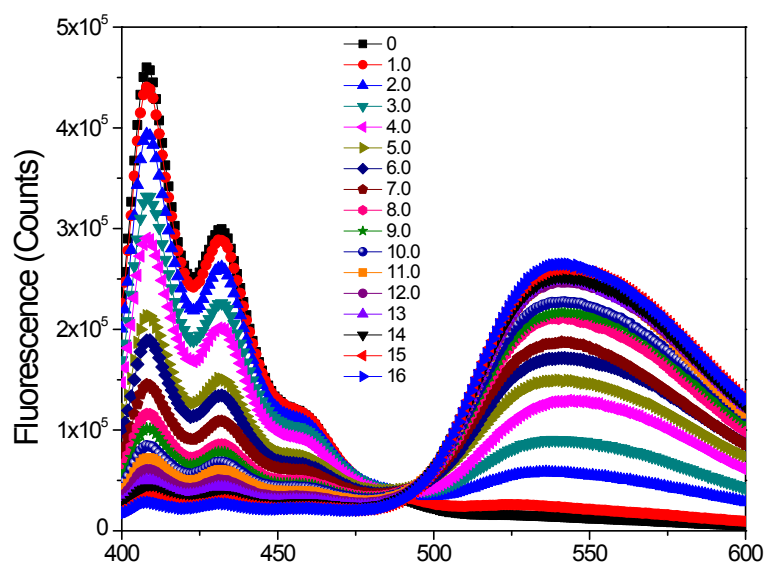

Figure S15 Fluorescence spectra of **9-ANB** in 1 mg/mL THF/H<sub>2</sub>O (1:3, v/v) mixture.

## 9-PHB

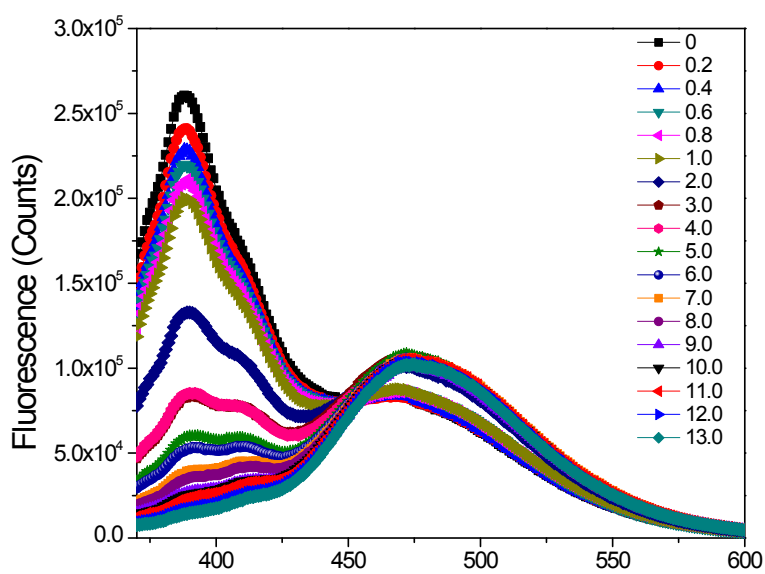

Figure S16 Fluorescence spectra of **9-PHB** in 1 mg/mL THF/H<sub>2</sub>O (1:3, v/v) mixture.

## 1-PYB

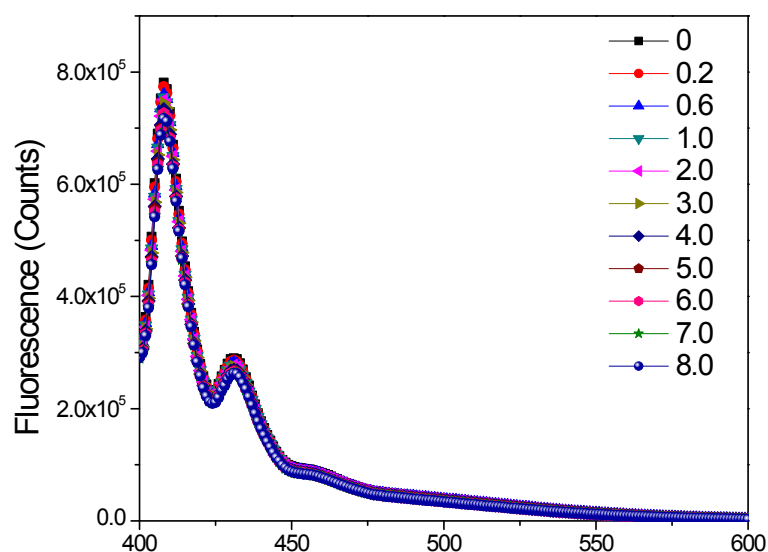

Figure S17 Fluorescence spectra of 1 mg/mL **9**-PYB THF solution, THF/H<sub>2</sub>O (1:0, v/v).

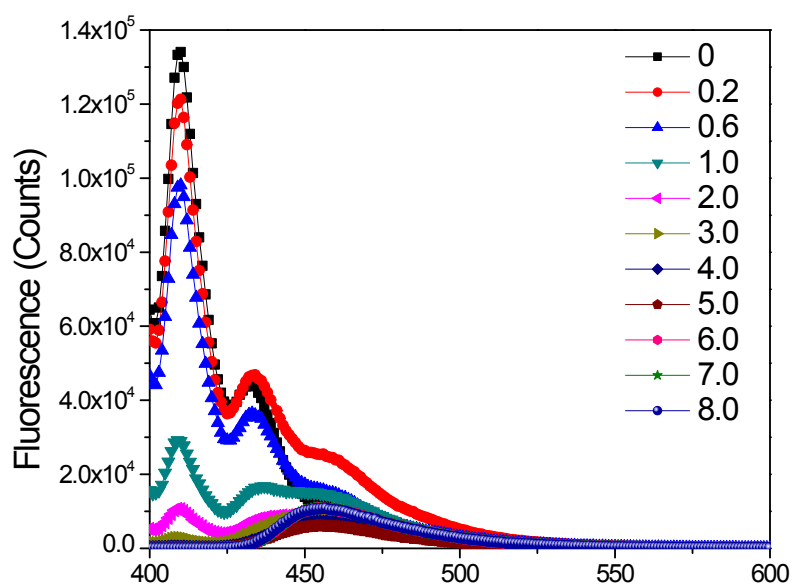

Figure S18 Fluorescence spectra of **9**-PYB in 1 mg/mL THF/H<sub>2</sub>O (1:1, v/v) mixture.

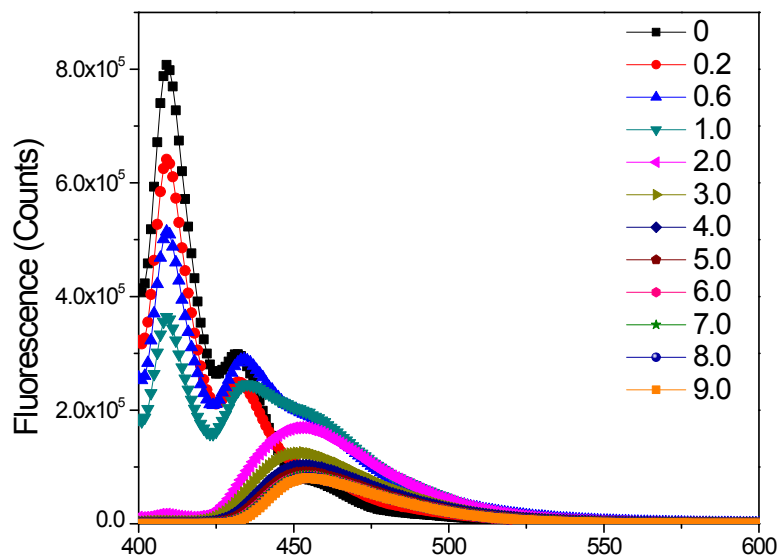

Figure S19 Fluorescence spectra of **9-PYB** in 1 mg/mL THF/H<sub>2</sub>O (1:2, v/v) mixture.

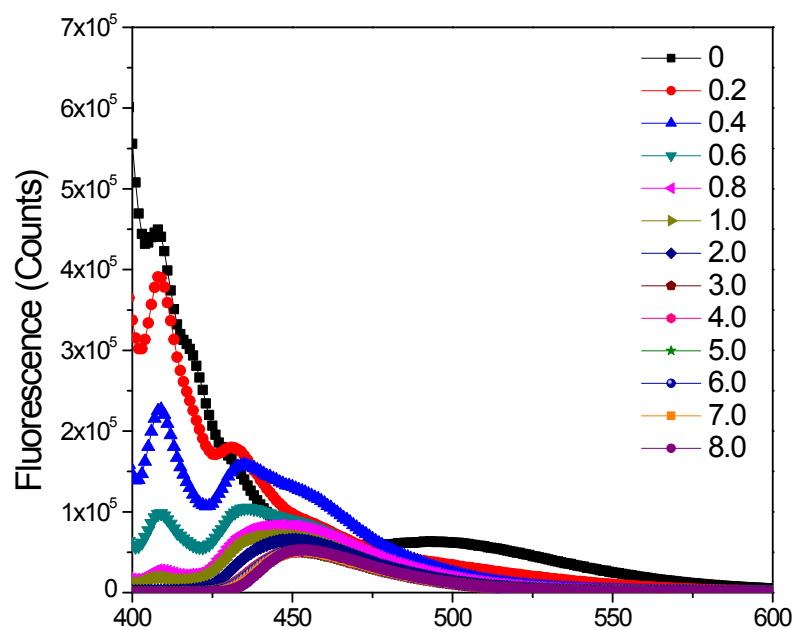

Figure S20 Fluorescence spectra of **9-PYB** in 1 mg/mL THF/H<sub>2</sub>O (1:3, v/v) mixture.

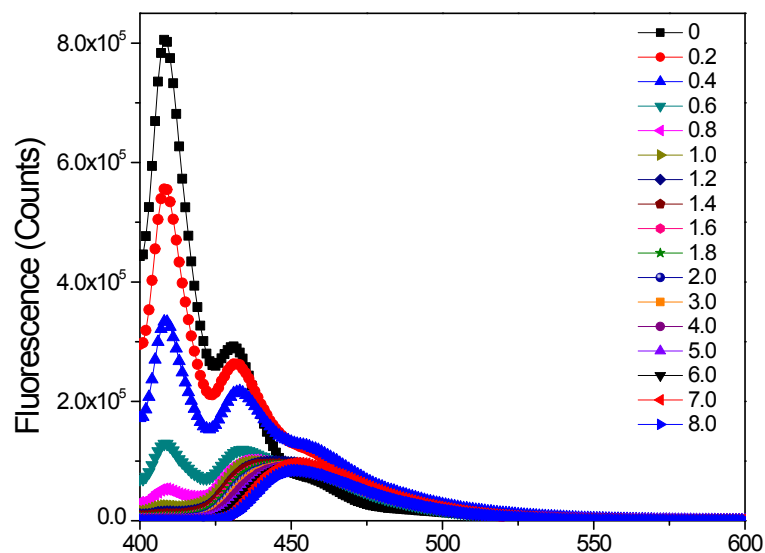

Figure S21 Fluorescence spectra of **9-PYB** in 1 mg/mL THF/H<sub>2</sub>O (1:4, v/v) mixture.

## Additional time related reaction monitoring data

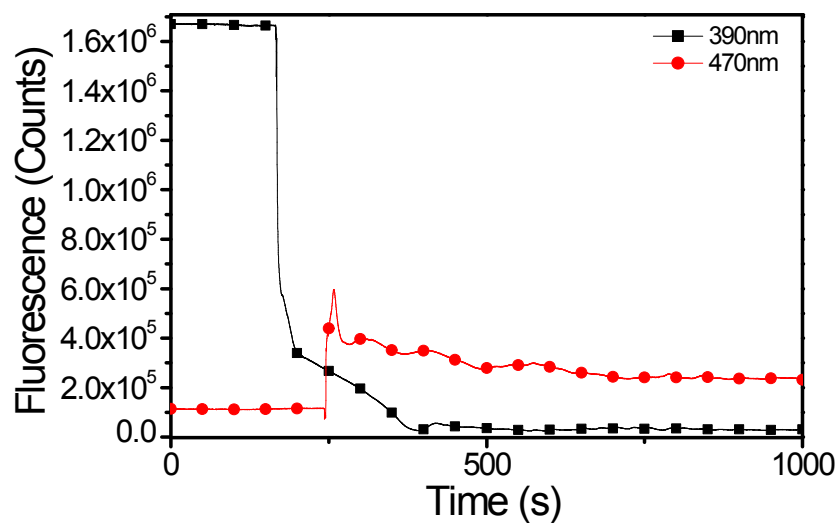

Figure S22 Fluorescence time curves of **9-PHB** in 1 mg/mL THF/H<sub>2</sub>O (1:3, v/v) mixture after adding 2  $\mu$ L Et<sub>3</sub>N at 390nm and 470 nm, excited at 350nm.

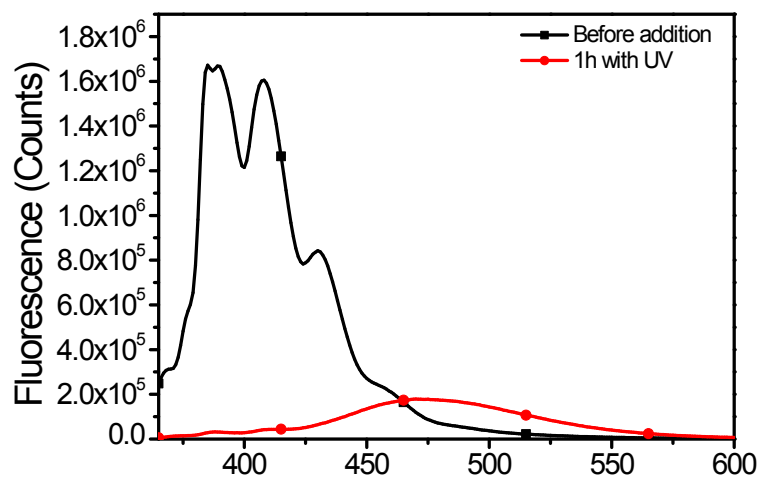

Figure S23 Fluorescence spectra of **9-PHB** in 1 mg/mL THF/H<sub>2</sub>O (1:3, v/v) mixture before adding 2 μL Et<sub>3</sub>N and after complete reaction.

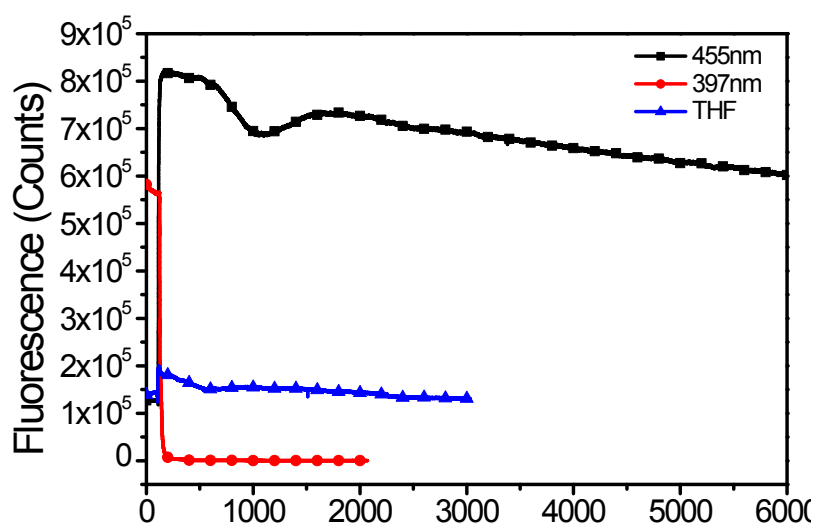

Figure S24 Fluorescence time curves of **9-PYB** in 1 mg/mL THF/H<sub>2</sub>O (1:3, v/v) mixture after adding 2 μL Et<sub>3</sub>N at 390nm and 455 nm, and time curve in pure THF at 390nm excited at 350nm.

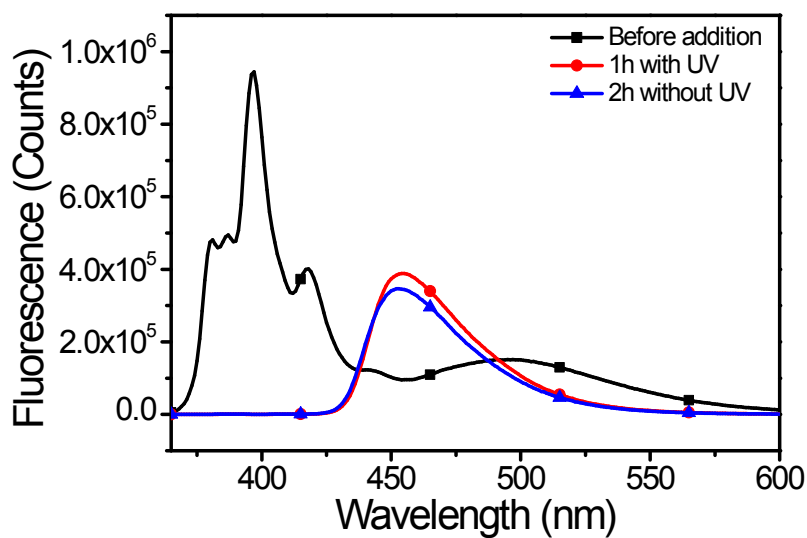

Figure S25 Fluorescence spectra of **9-PYB** in 1 mg/mL THF/H<sub>2</sub>O (1:3, v/v) mixture before adding 2  $\mu$ L Et<sub>3</sub>N and after complete reaction.

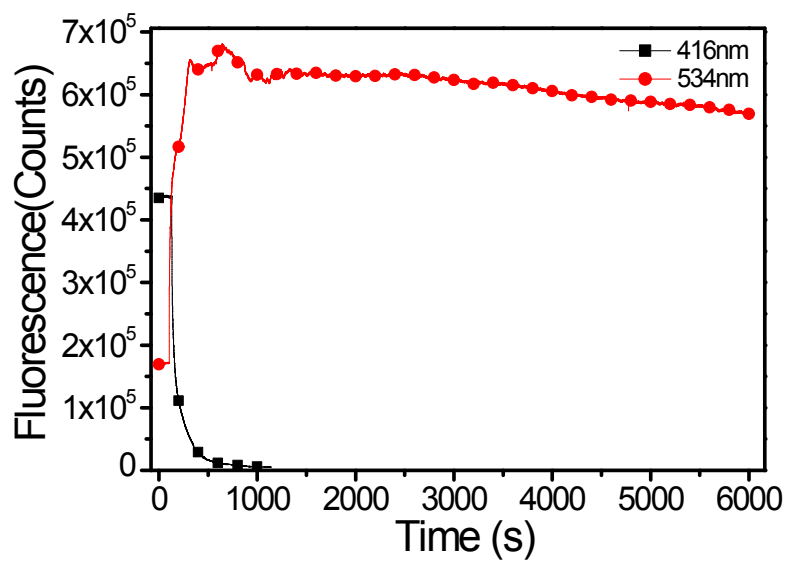

Figure S26 Fluorescence time curves of **2-ANB** in 1 mg/mL THF/H<sub>2</sub>O (1:3, v/v) mixture after adding 2  $\mu$ L Et<sub>3</sub>N at 416 nm and 534 nm, excited at 350 nm.

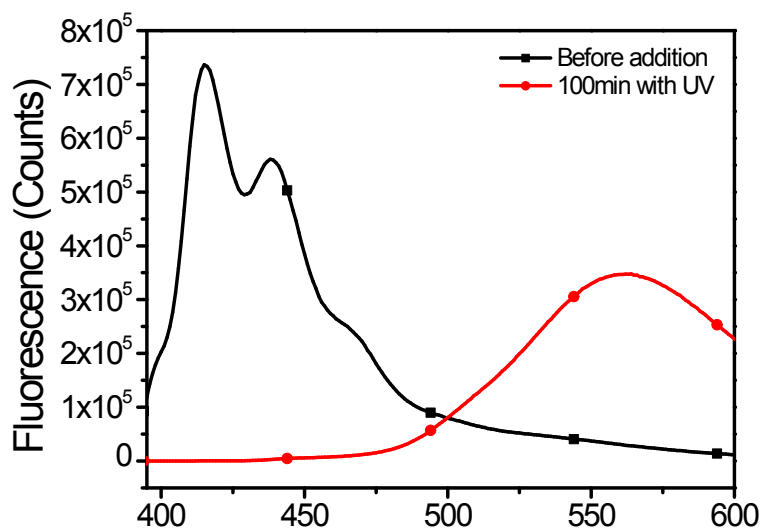

Figure S27 Fluorescence spectra of **2-ANB** in 1 mg/mL THF/H<sub>2</sub>O (1:3, v/v) mixture before adding 2  $\mu$ L Et<sub>3</sub>N and after complete reaction.

SEM photos of the micro-nano system.

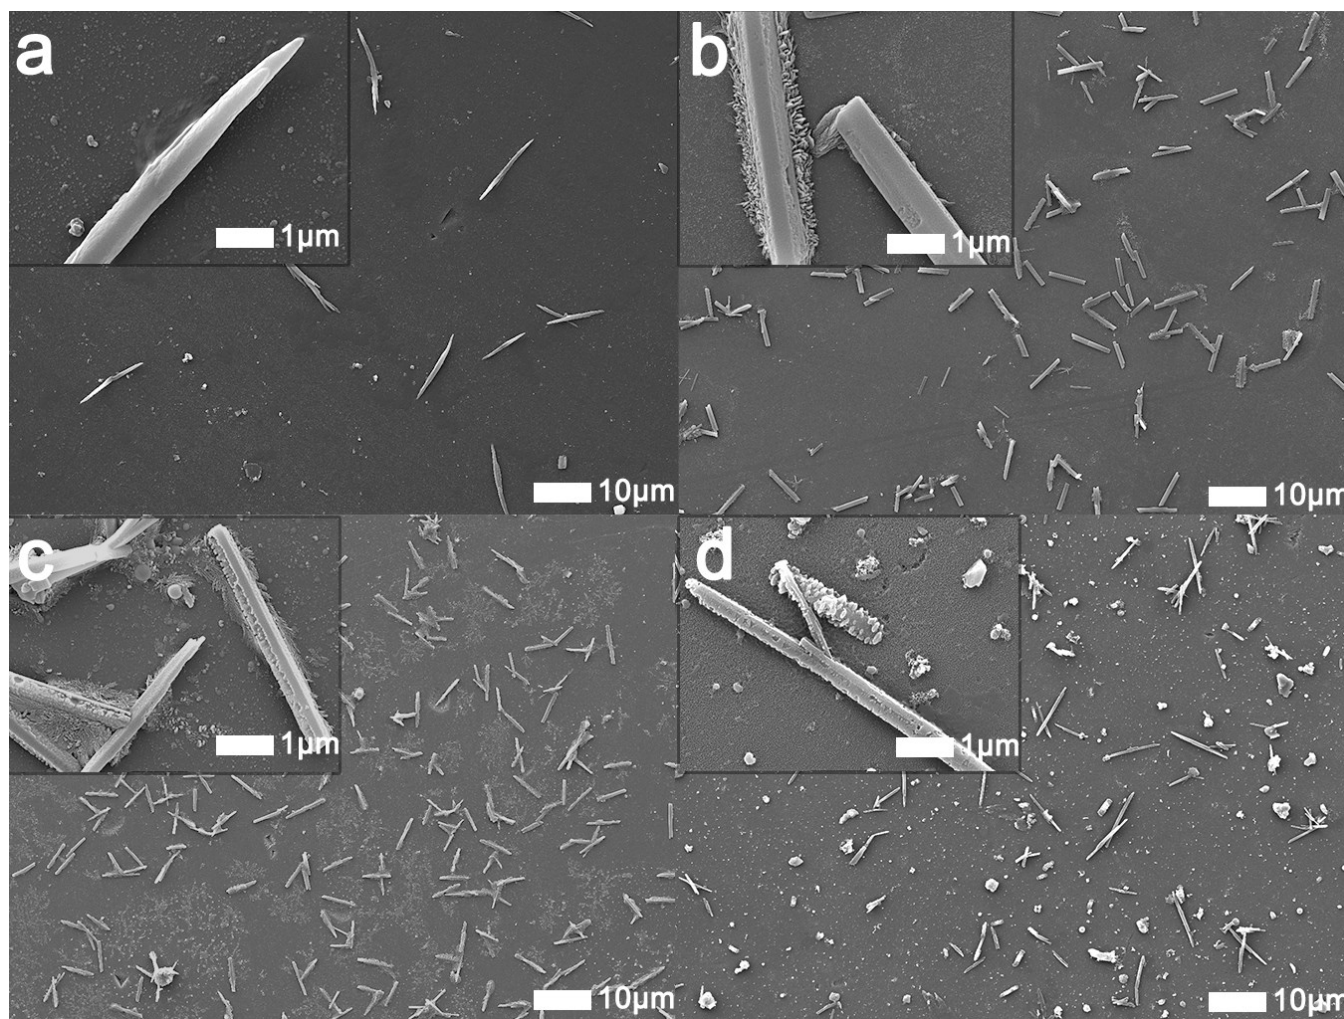

Figure S28 SEM photos of self-assembled 9-ANB in 1 mg/mL THF/H<sub>2</sub>O (1:3, v/v) mixture (a) before and after addition of (b) 4.5  $\mu$ L, (c) 9  $\mu$ L and (d) 13.5  $\mu$ L 40 mg/mL NaOH.

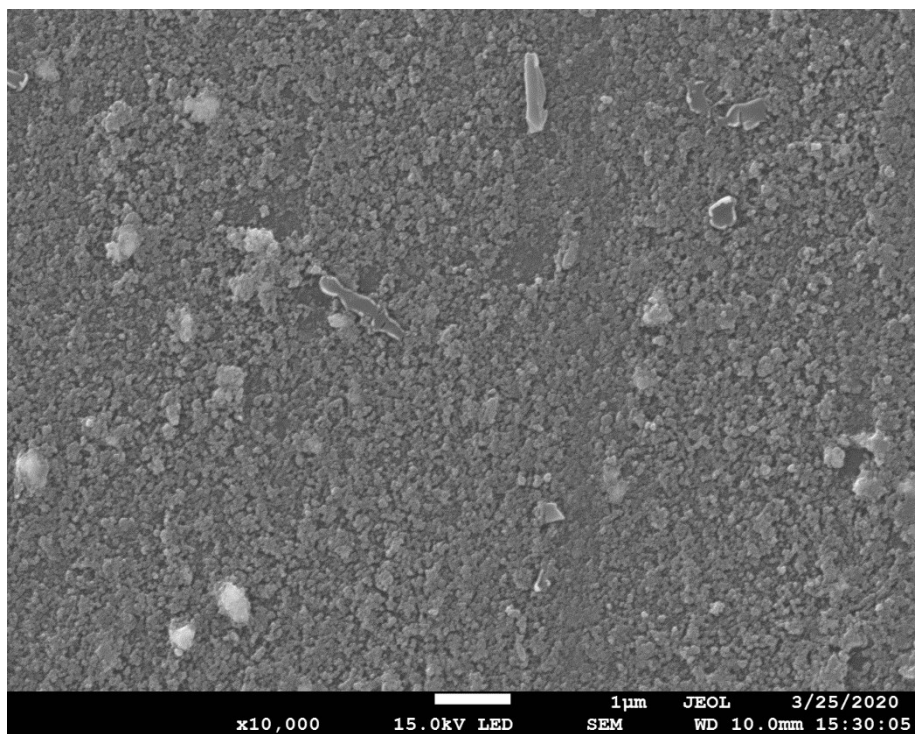

Figure S29 SEM image of complete amorphous 9-ANB, gained in 1 mg/mL EtOH/H<sub>2</sub>O (1:3, v/v) mixture.
